# Supplementary material for: Green manure combined with reduced nitrogen reduce NH3 emissions, improves yield and nitrogen use efficiencies of rice
Source: PeerJ. 2024 Jul 22;12:e17761. doi: 10.7717/peerj.17761 (PMC11636996; doi:10.7717/peerj.17761)
Supplement: Data S1 [file peerj-12-17761-s001.xlsx]

## Sheet: For Table 2
Year	Treatment	Total nitrogen content in aboveground parts of plants（kg ha-1）	Total nitrogen content of plant roots（kg ha-1）
2021	WR	21.05	1.28
	WR	23.34	1.35
	WR	25.09	1.45
	VvR	38.71	7.77
	VvR	39.08	8.72
	VvR	40.82	8.85
	VsR	57.67	6.68
	VsR	58.33	7.01
	VsR	61.13	7.89
	RR	23.35	3.15
	RR	28.59	3.29
	RR	27.16	3.59
	GR	67.25	9.75
	GR	68.59	10.58
	GR	71.16	11.47
	CK	20.91	1.18
	CK	22.15	1.23
	CK	25.14	1.31
2022	WR	18.93	1.37
	WR	20.41	1.47
	WR	22.54	1.55
	VvR	43.63	8.45
	VvR	44.52	9.12
	VvR	47.77	10.68
	VsR	45.22	9.11
	VsR	46.86	10.59
	VsR	48.11	11.36
	RR	22.33	4.21
	RR	27.12	4.33
	RR	27.93	4.51
	GR	71.73	10.23
	GR	73.52	11.35
	GR	75.68	12.13
	CK	19.52	1.22
	CK	22.15	1.42
	CK	22.65	1.51

## Sheet: For Table 3
Year	Period	Treatment	Ammonia emissions(kg ha-1)
2021	base fertilizer	CK	2.09809
			1.94045
		WR	30.8695
			30.1099
		VvR	25.6844
			23.3456
		VsR	28.307
			26.4497
		RR	17.2892
			16.5038
		GR	26.2777
			24.386
	tillering fertilizer	CK	2.30847
			2.22908
		WR	31.7981
			24.0765
		VvR	13.586
			8.78791
		VsR	17.4898
			12.8637
		RR	11.7459
			11.0752
		GR	17.6446
			15.0822
	panicle fertilizer	CK	3.88376
			4.18271
		WR	30.236
			27.4357
		VvR	16.1169
			13.0959
		VsR	14.3943
			16.0223
		RR	15.2215
			12.3326
		GR	16.6039
			17.6019
2022	base fertilizer	CK	1.80573
			2.0293
		WR	31.2392
			28.4647
		VvR	23.5749
			20.3647
		VsR	20.723
			22.3567
		RR	16.994
			15.9363
		GR	22.1905
			22.9758
	tillering fertilizer	CK	2.3658
			2.26525
		WR	32.2817
			27.6048
		VvR	20.3704
			17.0771
		VsR	20.8519
			19.0347
		RR	15.8131
			15.4353
		GR	22.3023
			23.1392
	panicle fertilizer	CK	2.0293
			2.25287
		WR	16.7298
			16.2487
		VvR	11.7803
			11.058
		VsR	10.8516
			12.7817
		RR	10.1293
			11.7596
		GR	12.451
			12.1242

## Sheet: For Table 4
Year	Treatment	Panicles per	Filled grains	Spikelets per panicle	A thousand	Yield of grain(t·ha-1)	Straw of grain(t·ha-1)
		(×104 ha–1)	rate (%)		grain weight (g)
201	CK	283.001	0.928405	113.412	26.46	6.70003	7.44004
		286.001	0.936786	118.906	25.87	6.27003	7.56004
					26.02	6.40003
	WR	327.002	0.912128	122.774	26.48	10.0551	10.3001
		341.002	0.894651	127.421	25.172	9.90005	9.50005
					25.61	9.87005
	VvR	357.002	0.937945	124.655	25.79	9.86005	10.3001
		361.002	0.931704	126.288	26.55	10.0851	11.6001
					25.85	10.2251	12.3001
	VsR	377.002	0.915119	124.951	24.78	10.5601	10.2001
		382.002	0.932209	127.162	26.62	10.2001	10.5001
					26.22	10.4
	RR	342.002	0.941324	126.87	26.82	9.80005	10.3001
		358.002	0.94593	123.805	26.05	10.0001	11.8001
					26.12	10.0301
	GR	380.002	0.951346	127.978	25.51	10.55	10.6001
		391.002	0.942332	124.675	25.89	10.7251	11.8001
					26.53	10.8001
2022	CK	292.917	89.3633	112.962	27.0707	6.38753	7.74904
		279.328	89.7391	109.432	27.5733	6.98253	7.35404
	WR	331.867	86.8377	123.655	25.2055	9.76455	10.3723
		343.27	83.3538	130	25.8374	9.8442	9.67015
	VvR	350.363	88.0613	129.374	26.6706	9.96515	11.8561
		346.261	89.4662	124.603	26.5198	10.1835	11.4372
	VsR	355.533	86.1061	127.824	25.901	10.1245	12.2809
		358.612	92.2017	126.499	25.9369	10.0242	11.2278
	RR	349.318	90.8033	122.575	25.2664	9.9681	10.2867
		357.814	90.4676	126.454	25.9411	9.95335	11.0655
	GR	350.085	88.7893	126.197	27.2795	10.3398	12.2809
		378.502	89.4465	128.427	25.3458	10.9711	12.7588

## Sheet: For Table 5
Year	Treatment	Grain nutrient content	Straw nutrient content
		(g kg-1)	(g·kg-1)
2021	CK	10.1385	10.5617
		11.8524	9.64987
		12.3914	9.55635
	WR	13.1274	10.4384
		11.2491	11.4372
		12.8445	12.2645
	VvR	11.3687	12.4737
		13.3262	10.5778
		13.8696	11.6294
	VsR	12.6715	12.053
		13.0887	11.1203
		13.7963	11.7629
	RR	12.5694	10.8762
		11.9123	11.2422
		12.9669	12.068
	GR	12.8963	12.8487
		13.2704	13.2156
		13.7791	12.249
2022	CK	12.1385	10.6168
		11.8524	9.49873
		10.3914	9.63459
	WR	13.2741	11.2438
		11.9065	12.0872
		13.4445	11.8865
	VvR	11.3687	12.7368
		13.3262	10.7784
		14.5896	12.2938
	VsR	12.6715	12.053
		14.0589	11.7276
		14.0296	11.7629
	RR	12.9357	12.5464
		12.3095	11.1242
		13.5232	11.668
	GR	12.9561	12.8487
		13.2136	12.2156
		14.3178	13.8249

## Sheet: For Fig1
Date	Average monthly temperature(℃)	Average monthly rainfall(mm)
2020-10-01	17.1129	8
2020-11-01	13.9167	6.65053
2020-12-01	3.98387	2.14933
2021-01-01	3.77419	12
2021-02-01	8.64286	31
2021-03-01	10.6774	7.37143
2021-04-01	15	6.66667
2021-05-01	21.5323	14.3333
2021-06-01	25.1897	10.05
2021-07-01	27.7097	37.2143
2021-08-01	27.0806	10.7143
2021-09-01	22.95	22.3333
2021-10-01	17.4032	14.35
2021-11-01	13.6	13
2021-12-01	4.03226	5
2022-01-01	3.35484	17
2022-02-01	3.71429	7.5
2022-03-01	11.6129	37.5
2022-04-01	17.15	27.3333
2022-05-01	20.8065	10
2022-06-01	27.75	19.5
2022-07-01	30.1613	36.4286
2022-08-01	30.0645	10.5
2022-09-01	22.7833	21
2022-10-01	16	8

## Sheet: For Fig2
Year			CK		WR		VvR		VsR		RR		GR
2021	base fertilizer	1d	0.420383	0.382166	1.49045	0.917198	1.07007	1.45223	0.955415	1.6051	0.878982	1.49045	0.955415	1.1465
		2d	0.573249	0.726115	17.5096	15.7006	14.707	13.6115	14.7325	12.0701	9.86625	10.5032	16.6879	14.8408
		3d	1.22293	1.8344	13.5223	12.5032	12.8408	10.7771	10.8089	9.01275	8.07008	7.10191	12.0319	11.8535
		4d	0.458599	0.496816	13.4713	12.9299	12.535	10.6242	12.0128	11.9809	10.6815	9.19109	12.6624	11.3758
		5d	0.382166	0.420383	12.7261	11.121	10.4586	9.10829	9.57326	8.33759	5.68154	5.28663	7.71338	7.293
		6d	0.458599	0.382166	5.49045	7.61784	3.85988	3.63058	8.82167	8.24205	1.90446	1.76433	5.18472	4.59873
		7d	1.1465	1.07007	5.38854	5.12102	1.6051	2.67516	6.00001	7.52867	1.33758	1.33758	3.15924	3.08281
	tillering fertilizer	1d	0.573249	0.726115	6.87899	5.80892	5.35032	4.39491	4.70064	3.93631	5.27389	3.21019	6.42039	4.66242
		2d	0.840765	0.917198	15.2102	12.4204	8.293	8.40765	9.17198	5.80892	7.18472	6.00001	11.2739	6.00001
		3d	0.611466	0.687899	11.0828	10.2038	6.42039	4.77707	6.07644	2.59873	3.85988	6.26752	7.18472	8.59873
		4d	0.573249	0.649682	5.57962	6.00001	4.28026	2.82803	3.21019	1.49045	2.78981	1.29936	5.42676	3.74523
		5d	0.496816	0.535032	8.90447	6.64969	5.69427	2.94268	2.48408	2.40765	3.28663	2.21656	4.92994	2.21656
		6d	0.535032	0.458599	9.05733	5.38854	4.77707	2.10191	1.56688	1.56688	2.10191	3.51593	2.25478	4.62421
		7d	0.382166	0.191083	6.6879	2.63694	2.10191	1.03185	1.18471	0.535032	0.535032	0.840765	0.458599	2.71338
		8d	0.267516	0.267516	4.54777	1.87261	0.917198	1.1465	0.764332	0.573249	0.343949	0.535032	0.343949	0.2293
		9d	0.305733	0.152866	1.75796	1.1465	0.458599	0.420383	0.573249	0.305733	0.458599	0.382166	0.305733	0.267516
		10d	0.343949	0.267516	0.955415	1.3758	0.573249	0.535032	0.458599	0.305733	0.267516	0.343949	0.611466	0.458599
		11d	0.191083	0.305733	0.917198	1.07007	0.343949	0.420383	0.382166	0.382166	0.2293	0.343949	0.305733	0.305733
		12d	0.152866	0.267516	0.802549	0.993632	0.305733	0.038217	0.343949	0.343949	0.191083	0.305733	0.267516	0.2293
		13d	0.152866	0.2293	0.687899	0.917198	0.305733	0.343949	0.343949	0.305733	0.152866	0.267516	0.2293	0.2293
		14d	0.152866	0.191083	0.573249	0.496816	0.267516	0.2293	0.152866	0.152866	0.152866	0.2293	0.152866	0.2293
		15d	0.152866	0.152866	0.382166	0.420383	0.267516	0.191083	0.11465	0.11465	0.11465	0.191083	0.11465	0.152866
	panicle fertilizer	1d	0.726115	0.993632	2.33121	2.59873	1.49045	1.22293	1.41401	1.18471	2.21656	1.94905	3.97453	1.87261
		2d	0.726115	0.573249	27.3249	18.0765	7.64332	2.17835	6.91721	5.27389	22.8153	1.22293	27.707	11.9618
		3d	0.420383	0.496816	19.6433	18.1147	3.28663	2.33121	5.31211	1.79618	12.3822	0.764332	11.8471	8.94268
		4d	0.687899	0.878982	12.6879	8.78982	1.79618	1.45223	1.87261	1.8344	2.86625	1.29936	5.42676	6.64969
		5d	0.878982	0.458599	5.73249	3.32484	1.1465	0.687899	0.764332	1.49045	1.94905	1.1465	3.05733	3.21019
		6d	0.535032	0.878982	3.32484	2.25478	0.993632	0.573249	0.726115	1.10828	1.52866	0.458599	3.09554	1.56688
		7d	0.917198	1.98726	2.25478	2.78981	1.3758	0.917198	2.14013	2.40765	1.3758	1.22293	3.55414	1.94905
		8d	1.41401	1.41401	4.01274	3.01911	1.41401	1.29936	1.75796	1.33758	1.26115	1.22293	2.67516	2.0637
		9d	1.45223	1.52866	3.78344	3.28663	2.02548	1.98726	2.25478	1.75796	2.21656	1.68153	2.5223	1.33758
		10d	1.87261	1.18471	3.09554	2.71338	1.64331	1.45223	2.82803	1.41401	1.41401	1.33758	1.33758	1.26115
		11d	0.458599	0.458599	1.29936	1.49045	1.1465	0.496816	0.496816	1.03185	0.611466	0.535032	0.840765	0.649682
		12d	0.382166	0.343949	1.68153	1.49045	0.382166	0.764332	0.2293	0.305733	0.305733	0.2293	0.458599	0.649682
		13d	0.382166	0.382166	0.955415	0.840765	0.343949	0.726115	0.2293	0.2293	0.267516	0.191083	0.535032	0.420383
		14d	0.191083	0.152866	0.573249	0.535032	0.152866	0.305733	0.152866	0.152866	0.191083	0.152866	0.191083	0.152866
		15d	0.191083	0.11465	0.382166	0.458599	0.11465	0.267516	0.152866	0.152866	0.152866	0.11465	0.152866	0.152866
2022	base fertilizer	1d	0.840765	0.917198	7.6051	8.67517	8.71339	8.71339	5.04459	6.22931	4.24204	3.85988	4.31848	10.586
		2d	0.649682	0.496816	18.0765	13.2994	15.9745	12.4204	12.535	14.637	11.3503	11.5032	11.1593	16.0128
		3d	0.955415	0.878982	13.3758	8.71339	9.70702	8.25479	9.40128	9.32485	11.8471	10.4713	11.8089	10.2421
		4d	0.687899	0.993632	12.8026	10.7006	7.29937	7.49045	8.56052	9.32485	11.3503	10.3949	11.465	7.98727
		5d	0.191083	0.382166	7.6051	3.55414	5.08281	2.98089	5.04459	6.57325	7.49045	4.54777	8.63695	6.42039
		6d	0.420383	0.458599	4.85351	3.32484	4.16561	2.98089	3.43949	2.86625	7.75797	1.87261	8.9809	4.16561
		7d	0.267516	0.382166	2.10191	1.98726	2.44586	1.41401	2.02548	0.726115	6.72612	0.764332	8.94268	1.64331
		8d	0.420383	0.573249	0.649682	1.41401	0.955415	0.611466	0.649682	0.802549	3.17198	0.726115	4.92994	1.41401
		9d	0.458599	0.305733	1.71975	1.29936	0.917198	0.764332	0.726115	0.496816	1.26115	1.71975	1.29936	2.98089
		10d	1.1465	0.764332	1.49045	1.26115	0.573249	0.840765	0.840765	1.03185	0.611466	0.764332	0.917198	1.79618
	tillering fertilizer	1d	0.99	0.84	13.45	8.83	7.2	8.42	9.39	8.83	5.32	6.5	8.87	9.34
		2d	0.73	0.88	11.96	16.09	11.16	10.57	11.89	11.01	9.75	8.56	10.48	11.82
		3d	0.76	0.69	11.66	8.56	7.8	5.04	7.83	6.34	6.18	5.04	6	7.18
		4d	0.65	0.8	8.25	6.42	4.81	4.36	3.85	3.51	3.08	3.05	4.43	4.46
		5d	0.42	0.31	8.94	7.03	5.55	3.1	4.93	3.55	3.4	3.5	5.27	5.76
		6d	0.34	0.31	4.89	3.32	1.15	1.07	1.15	1.34	1.53	1.61	3.63	3.32
		7d	0.31	0.38	3.82	2.87	1.45	0.61	0.61	1.41	0.61	0.76	1.49	1.72
		8d	0.4	0.31	4.04	3.03	3.55	3.1	4.93	3.55	3.14	2.9	4.27	3.76
		9d	0.34	0.31	2.89	3.32	1.15	1.07	1.15	1.34	1.53	1.61	3.63	3.32
		10d	0.31	0.22	1.82	1.87	1.45	0.61	0.61	1.41	0.61	0.76	1.49	0.72
	panicle fertilizer	1d	0.67	0.73	8.4	9.1	5.4	7.5	7.5	6.9	6.2	6.9	7.3	8.1
		2d	1.10828	1.18471	13.465	14.7261	11.5414	10.2038	9.85988	10.6624	9.17198	10.6242	11.8471	11.3121
		3d	0.878982	0.917198	10.6242	9.78345	7.94905	8.25479	7.8344	8.94268	6.68154	7.29937	8.48409	8.82803
		4d	0.687899	0.878982	5.19746	4.92994	2.82803	2.78981	3.17198	3.01911	3.86625	3.71338	3.36306	3.24841
		5d	0.649682	0.802549	4.01274	3.9172	2.17835	2.14013	1.56688	4.20383	1.56688	2.98726	2.78981	2.33121
		6d	0.687899	0.764332	2.71975	1.84077	1.10828	0.955415	1.3758	1.18471	0.993632	1.20255	0.840765	0.840765
		7d	0.496816	0.458599	1.15822	0.91083	0.573249	0.2293	0.305733	0.391083	0.2293	0.305733	0.343949	0.382166

## Sheet: For Fig3
	CK		WR		VvR		VsR		RR		GR
2021	1.30214	1.27313	9.13801	8.39794	5.29176	4.68479	5.88184	5.24367	4.44043	4.02328	5.89538	5.12321
2022	0.970772	0.937685	8.21857	7.34628	5.59204	4.7626	5.17821	5.40427	4.30738	4.33334	5.50723	5.30842

## Sheet: For Fig4
	CK			WR			VvR			VsR			RR			GR
2021	39.5083	37.07	34.98	43.3767	42.405	43.175	42.625	42.0383	45.155	43.34	43.9429	42.7533	43.9267	42.6983	42.3867	42.955	42.79	44.5133
2022	37.1417	38.3708	38.95	41.3708	43.1252	43.7292	41.2535	43.3458	44.55	41.8167	43.9542	43.6004	40.9958	43.2292	44.1625	41.8208	43.7792	44.3875
